## RESEARCH ARTICLE

## Effect of aluminum accumulation on bone and cardiovascular risk in the current era

Cynthia E. M. Carbonara<sup>1,2</sup>, Noemi A. V. Roza<sup>1,2</sup>, Kelcia R. S. Quadros<sup>1,2</sup>, Renata A. França<sup>2</sup>, André B. A. Esteves<sup>2</sup>, Celia R. Pavan<sup>2</sup>, Joaquim Barreto<sup>2,3</sup>, Luciane M. dos Reis<sup>4</sup>, Vanda Jorgetti<sup>4</sup>, Andrei C. Sposito<sup>3</sup>, Rodrigo Bueno Oliveira<sup>1,2\*</sup>

**1** Nephrology Division, School of Medical Sciences, University of Campinas (Unicamp), Campinas, Brazil, **2** Laboratory for Evaluation of Mineral and Bone Metabolism in Nephrology (LEMON), School of Medical Sciences, University of Campinas (Unicamp), Campinas, Brazil, **3** Laboratory of Atherosclerosis and Vascular Biology, Cardiology Division, School of Medical Sciences, University of Campinas (Unicamp), Campinas, Brazil, **4** Laboratory of Renal Pathophysiology, Department of Internal Medicine, School of Medicine, University of São Paulo, São Paulo, Brazil

\* [rbo@unicamp.br](mailto:rbo@unicamp.br)

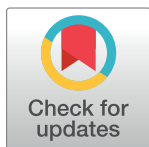

## Abstract

## Background

The prevalence of aluminum (Al) intoxication has declined over the past 3 decades. However, different groups still report on the diagnosis of Al in bone. Prolonged and low-intensity exposures to Al may not be captured by serum Al measurements, preventing its proper diagnosis. We hypothesize that bone Al accumulation may be related to bone and cardiovascular events in the current Era.

## Aims

To detect the diagnosis of bone Al accumulation; to explore bone and cardiovascular consequences of Al accumulation.

## Methods

This is a sub-analysis of *The Brazilian Registry of Bone Biopsy*, a prospective, multicentre cohort, with a mean follow-up of 3.4 years, including patients with CKD undergoing bone biopsy; bone fracture and major cardiovascular events (MACE) were adjudicated; Al accumulation was identified by solochrome-azurine staining; history of previous Al accumulation was registered based on information provided by the nephrologist who performed the bone biopsy; bone histomorphometry parameters, clinical data, and general biochemistry were registered.

## Results

275 individuals were considered; 96 (35%) patients have diagnosed with bone Al accumulation and were younger [50 (41–56) vs. 55 (43–61) years;  $p = 0.026$ ], had lower body mass index [23.5 (21.6–25.5) vs. 24.3 (22.1–27.8)  $\text{kg}/\text{m}^2$ ;  $p = 0.017$ ], higher dialysis vintage [108 (48–183) vs. 71 (28–132) months;  $p = 0.002$ ], presented pruritus [23 (24%) vs. 20 (11%);  $p$

## OPEN ACCESS

**Citation:** Carbonara CEM, Roza NAV, Quadros KRS, França RA, Esteves ABA, Pavan CR, et al. (2023) Effect of aluminum accumulation on bone and cardiovascular risk in the current era. PLoS ONE 18(4): e0284123. <https://doi.org/10.1371/journal.pone.0284123>

**Editor:** Robert Daniel Blank, Medical College of Wisconsin, UNITED STATES

**Received:** July 29, 2022

**Accepted:** March 24, 2023

**Published:** April 20, 2023

**Copyright:** © 2023 Carbonara et al. This is an open access article distributed under the terms of the [Creative Commons Attribution License](https://creativecommons.org/licenses/by/4.0/), which permits unrestricted use, distribution, and reproduction in any medium, provided the original author and source are credited.

**Data Availability Statement:** All relevant data are within the paper and its [Supporting information files](#).

**Funding:** The author(s) received no specific funding for this work.

**Competing interests:** The authors have declared that no competing interests exist.

= 0.005], tendon rupture [7 (7%) vs. 3 (2%);  $p = 0.03$ ] and bone pain [2 (0–3) vs. 0 (0–3) units;  $p = 0.02$ ]. Logistic regression reveals that prior bone Al accumulation [OR: 4.517 (CI: 1.176–17.353);  $p = 0.03$ ] and dialysis vintage [OR: 1.003 (CI: 1.000–1.007);  $p = 0.046$ ] as independent determinants of bone Al accumulation; minor perturbations in dynamic bone parameters and no differences in bone fractures rate were noted; MACE was more prevalent in patients with bone Al accumulation [21 (34%) vs. 23 (18%) events;  $p = 0.016$ ]. Cox regression shows the actual/prior diagnosis of bone Al accumulation and diabetes *mellitus* as independent predictors for MACE: [HR = 3.129 (CI: 1.439–6.804;  $p = 0.004$ ) and HR = 2.785 (CI: 1.120–6.928;  $p = 0.028$ ].

## Conclusions

An elevated proportion of patients have bone Al accumulation, associated with a greater prevalence of bone pain, tendon rupture, and pruritus; bone Al accumulation was associated with minor perturbations in renal osteodystrophy; actual/prior diagnosis of bone Al accumulation and diabetes *mellitus* were independent predictors for MACE.

## Introduction

The era of aluminum (Al) intoxication as the cause of dialysis dementia epidemic ended in the 80s–90s of the last century, with the incorporation of new technologies for treating water used for hemodialysis and the proscription of aluminum-based drugs [1–4].

The understanding of the causes involved in Al contamination and the use of desferrioxamine, this complication decreased in medical practice, limited to some anecdotal case report descriptions or in accidental conditions [5–7]. However, different groups from China, Uruguay and Argentina still report on case series and cohorts with the diagnosis of bone Al accumulation and complications related to Al load [8–10].

In Brazil, despite the adoption of international guidelines to prevent Al intoxication [11], we also still detect Al in bone [12–14]. Here, due to a unique characteristic, bone biopsies depend on the medical indication and the patient's acceptance, since bone biopsy is analyzed in reference centers at no cost to the patient. This practice allows identifying cases of bone Al accumulation over the decades by the gold standard method: bone biopsy stained by solochrome azurine [4, 15].

The incongruence of continued bone Al detection despite reduced Al exposure deserves consideration of two main possibilities: (1) prolonged and low-intensity exposures to Al sources may not be adequately captured by measurements of serum Al levels, since it does not reflect deposition in tissue, preventing its proper diagnosis; [4, 15] (2) the high incidence and prevalence of chronic kidney disease (CKD) cause a global burden for healthcare systems, with an elevated disparity in treatment access and heterogeneous standards of quality in provided care [16–22].

These facts lead us to hypothesize that bone Al accumulation still occurs in a considerable proportion of the population with CKD, not as a classical presentation syndrome with systemic signs of intoxication as it was in the past; instead, with chronic effects in bone, mineral metabolism, and may be in other organs, such as the heart.

Of note, preclinical evidence suggests that Al has cardiac toxicity through alterations in oxidative stress [23, 24], apoptosis [23], lipoproteins [25], myocardial inflammatory cytokines,

and vascular reactivity [26, 27], it seems to be reasonable to speculate that Al accumulation in patients with CKD can affect the cardiovascular system. There is a lack of data regarding Al accumulation and its consequences in the cardiovascular system of patients with CKD.

This study aims are to detect the actual frequency of diagnosis of bone Al accumulation and to explore bone and cardiovascular consequences of bone Al accumulation in a prospective cohort of Brazilian patients undergoing bone biopsy, through a pre-specified analysis of *The Brazilian Registry of Bone Biopsy* (REBRABO) [28].

## Material and methods

### Study design and patient selection

This study was conducted as a sub-analysis of REBRABO [28], a prospective, national multi-centre cohort, which consisted of the longitudinal follow-up of patients with chronic kidney disease according to the Kidney Disease Improving Global Outcomes (KDIGO) [29], all adults, undergoing bone biopsy. The main objective of this analysis was to detect the diagnosis of bone Al accumulation and to describe clinically relevant associations in the context of renal osteodystrophy. A secondary objective was to explore bone and cardiovascular consequences of bone Al accumulation.

During the period from August 2015 to December 2021, 511 patients underwent bone biopsy and had their data included in REBRABO. Patients who lost their follow-up (N = 111), or have not bone biopsy report (N = 40), or estimated glomerular filtration rate > 90 mL/min (N = 28), or have not signed their consent (N = 24), or have bone fragment inadequate for diagnostic (N = 23), or bone biopsy indicated by another specialty than Nephrology (N = 6), or < 18 years old (N = 4) were excluded from this analysis.

The baseline was defined as the time when the patient underwent bone biopsy. The prospective analysis included data from patients who completed at least 12 months of follow-up. Over a mean follow-up of 3.4 years (693 to 1508 days), the following events were adjudicated: bone fracture and major cardiovascular events (unstable angina, nonfatal acute myocardial infarction, elective or emergency coronary revascularization, transient ischemic attack, stroke, and cardiovascular death).

Written informed consent was obtained from all subjects and patients; the local ethics committee approved the study protocol under numbers CAAE 4131141.6.0000.5404, and the clinical and research activities being reported are consistent with the Declaration of Helsinki.

### Clinical, demographic, and laboratory data

The clinical, demographic, and laboratory data were collected at baseline and follow-up using standard electronic forms available at the REBRABO web system. The baseline data were entered by a nephrologist who performed the bone biopsy and validated by a single researcher. Data about previous Al accumulation, as well, as those related to clinical symptoms (e.g., bone pain, pruritus, myalgia) were based on information from the nephrologist who performed the bone biopsy. Symptoms and complications related to renal osteodystrophy were scored as the following: bone pain intensity (pain visual analog scale; intensity from 0 to 5); for pruritus, myalgia, tendon rupture, bone deformity, and bone fractures, the information was categorized into “yes” or “no”; The follow-up data were obtained and validated by researchers. These data were collected by telephone call with the nephrologists, the dialysis unit’s staff, and the patients.

In this sub-analysis of REBRABO, the following data were considered: clinical—age, gender, ethnicity, diagnosis of diabetes *mellitus*, CKD etiology, residual estimated glomerular filtration rate, dialysis vintage, and modality, prior cardiovascular disease (coronary disease,

myocardial infarct, or stroke), prior parathyroidectomy, prior diagnosis of bone Al accumulation, symptoms and complications related to renal osteodystrophy (bone pain intensity, pruritus, myalgia, tendon rupture, bone deformity, and bone fractures); laboratory—serum levels of total calcium, phosphate, parathormone, alkaline phosphatase, 25-hydroxyvitamin D and hemoglobin.

### Bone biopsy and tissue analysis

Bone biopsy was indicated by medical reasons (main indications: persistent bone pain, unexplained hypercalcemia or hyperphosphatemia, non-traumatic bone fractures, and suspicion of Al accumulation) or research protocol. Bone fragments were obtained via transiliac bone biopsies using an electrical trephine after pre-labeling with tetracycline (3 days) administered over two separated periods 10 days apart. Undecalcified bone fragments were submitted to standard processing for histological studies [30].

Al bone content was identified by solochrome azurine staining. We examined all fields of the trabecular bone samples under the magnification of x125. We considered the diagnosis of bone Al accumulation when 30% or more of the surface of the trabecular bone was covered by Al. This relatively high cutoff allows for increasing the specificity, avoiding false-positive diagnosis.

Bone histomorphometry was conducted using the Osteomeasure software (Osteometrics Inc., Atlanta, Ga., USA). Static and dynamic parameters were analyzed following the Standards of the American Society of Bone and Mineral Research [31]. Bone sections were stained with toluidine blue. The references range used for static and dynamic parameters was obtained from dos Reis LM *et al.* and Vedi S *et al.*, respectively [32, 33]. The samples from individual patients were classified as having osteitis fibrosa, mixed uremic osteodystrophy, adynamic bone disease, osteomalacia, and osteoporosis [34].

### Statistical analysis

The continuous variables are reported as the means  $\pm$  SD or medians and interquartile intervals. The categorical data are reported as frequencies and percentages. Mann-Whitney test,  $X^2$ , Fisher exact test, and Z-test were applied to compare patients with and without bone Al accumulation, as appropriate. Binary logistic regression was performed to identify the independent determinants of the diagnosis of bone Al accumulation. Covariates and factors selected from the univariate regression were body mass index, residual renal function (GFR  $<$  15 mL/min, reference), dialysis modality (reference, peritoneal dialysis), dialysis vintage, calcium salts use, and prior bone Al accumulation. Cox regression analysis, enter method, was undertaken with MACE-dependent variables. The following independent covariates and factors were selected from univariate regression analysis: diagnostic of diabetes *mellitus*, actual/prior diagnosis of bone Al accumulation, and previous history of cardiovascular disease. A Kaplan-Meier curve with a log-rank test was used to represent survival related to MACE. Statistical analyses were performed using SPSS 22.0 (SPSS Inc., Chicago, IL). A two-sided p-value  $<$  0.05 was considered statistically significant.

### Results

Data from 275 individuals were considered in our analysis. Patients were relatively young and all of them had CKD: 221 (80%) were on hemodialysis, 27 (10%) on peritoneal dialysis, and 27 (10%) on conservative management. Detailed clinical and biochemical baseline characteristics are summarized in Table 1.

**Table 1. General clinical and biochemical data according the diagnosis of bone aluminum (Al) accumulation.**

|                                        | All<br>(N = 275) | No Al accumulation<br>(N = 179) | Al accumulation<br>(N = 96) | p             |
|----------------------------------------|------------------|---------------------------------|-----------------------------|---------------|
| Age (years)                            | 52 (42–60)       | 55 (43–61)                      | 50 (41–56)                  | <b>0.026</b>  |
| Body mass index (kg/m <sup>2</sup> )   | 24.1 (21.9–27.4) | 24.3 (22.1–27.8)                | 23.5 (21.6–25.5)            | <b>0.017</b>  |
| Gender (male; N, %)                    | 143 (52)         | 96 (54)                         | 47 (49)                     | 0.46          |
| Ethnicity (Caucasian; N, %)            | 118 (43)         | 83 (46)                         | 35 (37)                     | 0.11          |
| Diabetes mellitus (N, %)               | 39 (14)          | 27 (15)                         | 12 (12)                     | 0.55          |
| Prior cardiovascular disease (N, %)    | 27 (10)          | 16 (9)                          | 11 (11)                     | 0.50          |
| CKD etiology                           |                  |                                 |                             | 0.14          |
| Hypertension (N, %)                    | 78 (28)          | 56 (31)                         | 22 (23)                     |               |
| Chronic GN (N, %)                      | 65 (24)          | 37 (21)                         | 28 (29)                     |               |
| Diabetes mellitus (N, %)               | 37 (13)          | 25 (14)                         | 12 (12)                     |               |
| Residual RF (eGFR < 15 mL/min; N, %)   | 244 (89)         | 149 (83)                        | 95 (99)                     | <b>0.0001</b> |
| Dialysis vintage (months)              | 84 (36–146)      | 71 (28–132)                     | 108 (48–183)                | <b>0.002</b>  |
| Dialysis modality (hemodialysis; N, %) | 221 (80)         | 130 (73)                        | 91 (95)                     | <b>0.02</b>   |
| Hemoglobin (g/dL)                      | 11.5 (10.3–13)   | 11.5 (10.4–13.1)                | 11.4 (10.2–12.8)            | 0.37          |
| Total calcium (mg/dL)                  | 9.3 (8.6–9.8)    | 9.2 (8.6–9.8)                   | 9.3 (8.6–9.9)               | 0.66          |
| Phosphate (mg/dL)                      | 5 (3.9–6.5)      | 4.6 (3.8–6)                     | 5.6 (4.5–7.1)               | <b>0.0001</b> |
| Parathormone (pg/mL)                   | 234 (65–733)     | 253 (83–780)                    | 173 (37–656)                | <b>0.04</b>   |
| Alkaline phosphatase (IU/L)            | 120 (79–217)     | 117 (81–210)                    | 129 (71–220)                | 0.62          |
| 25-vitamin D (ng/mL)                   | 29.6 (20.5–38)   | 30.7 (22–38)                    | 28.3 (19.3–40)              | 0.87          |

GN, glomerulonephritis; RF, residual function. Continuous variables are expressed as median and interquartile range (25th–75th).

<https://doi.org/10.1371/journal.pone.0284123.t001>

Ninety-six patients were diagnosed with bone Al accumulation. Serum Al levels were 10.6 (5.5–18.4) µg/L, and were not different between those with or without bone Al accumulation ( $p = 0.55$ ); 10 (17%) patients had serum Al levels > 30 µg/L. Compared with patients without a diagnosis of Al accumulation, patients with the diagnosis of Al intoxication were younger [50 (41–56) vs. 55 (43–61) years;  $p = 0.026$ ] and had a lower body mass index [23.5 (21.6–25.5) vs. 24.3 (22.1–27.8) kg/m<sup>2</sup>;  $p = 0.017$ ]. They had higher dialysis vintage [108 (48–183) vs. 71 (28–132) months;  $p = 0.002$ ] and serum phosphate [5.6 (4.5–7.1) vs. 4.6 (3.8–6) mg/dL;  $p = 0.0001$ ], and lower parathormone [173 (37–656) vs. 253 (83–780) pg/mL;  $p = 0.04$ ] levels. Almost all patients with bone Al accumulation were on hemodialysis treatment [91 (95%)]. Of note, we observed a higher proportion of calcium salts use among patients with bone Al accumulation [33 (34%) vs. 37 (21%),  $p = 0.01$ ]. The use of Al-based P binders was not observed.

At baseline patients with bone Al accumulation presented more clinical symptoms and complications related to renal osteodystrophy than those without. They presented a higher frequency of pruritus [23 (24%) vs. 20 (11%);  $p = 0.005$ ], episodes of tendon rupture [7 (7%) vs. 3 (2%);  $p = 0.03$ ], and more intensity of bone pain [2 (0–3) vs. 0 (0–3) units;  $p = 0.02$ ]. They had more history of prior parathyroidectomy [26 (27%) vs. 20 (11%);  $p = 0.001$ ] and prior diagnosis of bone Al accumulation [12 (12%) vs. 3 (2%);  $p = 0.0001$ ]. There were no differences in the frequency of bone deformities [20 (21%) vs. 22 (12%);  $p = 0.06$ ], myalgia [32 (33%) vs. 44 (25%);  $p = 0.12$ ], and bone fractures [19 (20%) vs. 28 (16%);  $p = 0.38$ ].

Logistic regression reveals the diagnosis of prior bone Al accumulation [OR: 4.517 (CI: 1.176–17.353);  $p = 0.03$ ] and dialysis vintage [OR: 1.003 (CI: 1.000–1.007);  $p = 0.046$ ] as independent determinants of actual diagnosis of bone Al accumulation.

One hundred and ten patients had bone histomorphometric analysis. Normal bone histology was detected in 4 patients, one of them in a patient with the diagnosis of bone Al

**Table 2. Histomorphometric bone parameters according to the diagnosis of bone aluminum (Al) accumulation.**

|                                           | All<br>(N = 110)    | No Al accumulation<br>(N = 86) | Al accumulation<br>(N = 24) | p            |
|-------------------------------------------|---------------------|--------------------------------|-----------------------------|--------------|
| BV/TV (%)                                 | 20.2 (20.1–25)      | 20.4 (16.1–28)                 | 20.2 (15.6–26)              | 0.50         |
| Tb.Th ( $\mu\text{m}$ )                   | 123 (110–140)       | 124 (112–144)                  | 120 (103–135)               | 0.19         |
| Tb.Sp ( $\mu\text{m}$ )                   | 464 (364–594)       | 466 (364–603)                  | 460 (369–581)               | 0.82         |
| Tb.N (mm/mm)                              | 1.64 (1.38–1.97)    | 1.69 (1.4–1.9)                 | 1.61 (1.31–1.97)            | 0.75         |
| OV/BV (%)                                 | 1.52 (0.62–4.06)    | 1.51 (0.61–3.58)               | 1.61 (0.8–5.33)             | 0.40         |
| O.Th ( $\mu\text{m}$ )                    | 7.1 (5.4–8.7)       | 7 (5.2–8.6)                    | 7.5 (5.7–8.8)               | 0.53         |
| OS/BS (%)                                 | 15.1 (7.5–30.5)     | 15.1 (7.5–29.6)                | 18.1 (8.6–34)               | 0.42         |
| Ob.S/BS (%)                               | 2.77 (1.36–7.22)    | 2.39 (1.33–6.47)               | 5.8 (1.65–8.03)             | 0.12         |
| ES/BS (%)                                 | 3.8 (2.44–7.24)     | 3.77 (2.28–6.43)               | 5.40 (2.51–7.57)            | 0.37         |
| Oc.S/BS (%)                               | 0.27 (0.09–0.62)    | 0.27 (0.09–0.63)               | 0.25 (0.08–0.57)            | 0.77         |
| MS/BS (%)                                 | 5.73 (2.71–10.14)   | 5.1 (2.52–10.56)               | 6.87 (4.08–9.37)            | 0.83         |
| MAR ( $\mu\text{m}/\text{dia}$ )          | 0.68 (0.48–0.94)    | 0.65 (0.48–0.94)               | 0.72 (0.61–1.08)            | 0.35         |
| BFR/BS ( $\mu\text{m}^3/\mu^2/\text{d}$ ) | 0.030 (0.011–0.082) | 0.030 (0.014–0.090)            | 0.034 (0.000–0.073)         | 0.31         |
| Aj.Ar ( $\mu\text{m}/\text{d}$ )          | 0.305 (0.170–0.577) | 0.319 (0.189–0.617)            | 0.282 (0.116–0.425)         | 0.19         |
| Mlt (d)                                   | 32.58 (17.28–68.08) | 25.06 (13.91–58.81)            | 60.5 (21.6–285)             | <b>0.012</b> |
| Fb.V/TV (%)                               | 0.039 (0.009–0.171) | 0.043 (0.013–0.277)            | 0.014 (0.000–0.080)         | <b>0.018</b> |

BV/TV, bone volume/tissue volume; Tb.Th, trabecular thickness; Tb.Sp, trabecular separation; trabecular number; OV/BV, osteoid volume/bone volume; O.Th, osteoid thickness; OS/BS, osteoid surface/bone surface; Ob.S/BS, osteoblasts surface/bone surface; ES/BS, eroded surface/bone surface; Oc.S/BS, osteoclast surface/bone surface; MS/BS, mineralized surface/bone surface; MAR, mineral apposition rate; BFR/BS, bone formation rate/bone surface; Aj.Ar, adjusted area; Mlt, mineralization lag time; Fb.V/TV, fibrosis volume/tissue volume.

<https://doi.org/10.1371/journal.pone.0284123.t002>

accumulation. The same proportion of renal osteodystrophy types was observed comparing patients with and without a diagnosis of bone Al accumulation ( $p = 0.11$ ): fibrous osteitis [7 (29%) vs. 28 (33%)], mixed uremic osteodystrophy [6 (25%) vs. 9 (10%)], adynamic bone disease [9 (37%) vs. 46 (53%)], osteomalacia [1 (4%) vs. 0(0%)]; and osteoporosis [14 (58%) vs. 49 (57%),  $p = 0.905$ ].

Histomorphometric bone parameters according to the diagnosis of bone Al accumulation show no significant differences in structural, resorption, and formation parameters. In dynamic parameters, only mineralization lag time was higher in patients with the diagnosis of bone Al accumulation (Table 2).

### Exploratory analysis of bone and cardiovascular consequences related to bone Al accumulation

Over a mean follow-up of 3.4 years (693 to 1508 days), bone fracture and MACE were adjudicated. The same proportion of bone fractures was registered between those with or without bone Al accumulation [8 (13%) vs. 20 (16%);  $p = 0.63$ ].

MACE in patients with bone Al accumulation reached 21 (34%) events compared with 23 (18%) in those patients without ( $p = 0.016$ ). Patients who experienced MACE had lower serum levels of hemoglobin ( $11.3 \pm 2.1$  vs.  $12 \pm 2.1$ ;  $p = 0.026$ ), more diagnosis of diabetes *mellitus* [11 (25%) vs. 15 (10%);  $p = 0.013$ ], history of cardiovascular disease [8 (18%) vs. 8 (5%);  $p = 0.008$ ], and actual/prior diagnosis of bone Al accumulation [22 (50%) vs. 42 (29%);  $p = 0.01$ ].

Cox regression analysis shows the actual/prior diagnosis of bone Al accumulation and diabetes *mellitus* as independent predictors for MACE: 3.129 (CI: 1.439–6.804;  $p = 0.004$ ) and HR = 2.785 (CI: 1.120–6.928;  $p = 0.028$ ) (Fig 1).

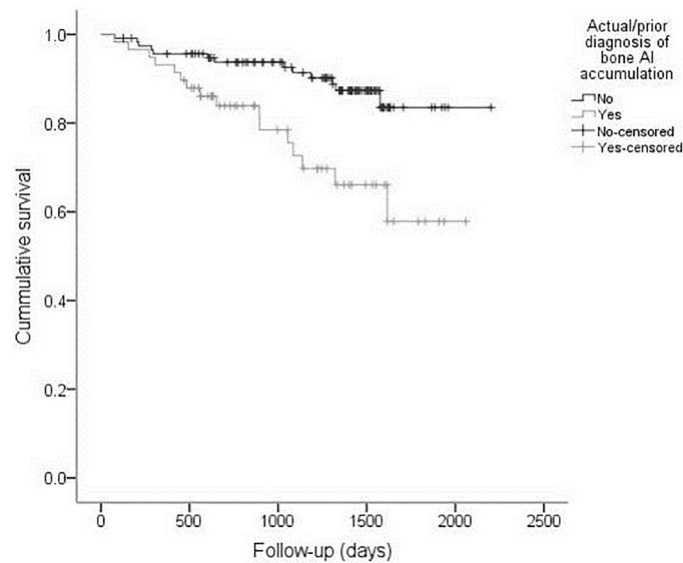

**Fig 1. Kaplan-Meier curve for MACE according to actual/prior diagnosis of bone Al accumulation (log-rank;  $p = 0.002$ ).**

<https://doi.org/10.1371/journal.pone.0284123.g001>

## Discussion

Our study shows the following main findings: (1) an elevated proportion of patients have the diagnosis of bone Al accumulation, which was associated with a greater prevalence of bone pain, tendon rupture, and pruritus; (2) bone Al accumulation was associated with minor perturbations in bone dynamic parameters; none difference in static bone parameters, the proportion of classical renal osteodystrophy types and bone fractures were observed; (3) actual/prior diagnosis of bone Al accumulation and diabetes *mellitus* were independent predictors for MACE.

After the 90s of the last century, severe symptoms reflecting Al intoxication disappeared because adoption of international guidelines to avoid contamination [2–4, 11]. The diagnosis has become almost exclusively through the serum Al measurements and epidemiological data from American studies concludes that Al intoxication is an uncommon finding. Two retrospective cohorts analyzed more than seven thousand serum Al measurements in patients on hemodialysis and peritoneal dialysis from 2000 to 2009, with 2.1% of the samples altered and without significant clinical manifestations [35, 36].

Measurement of serum Al does not reflect the tissue load accurately [15, 37]. Van Landeghem and collaborators showed that patients with iron overload and normal levels of serum Al can have bone disease related to this metal [15]. Serum measurements can be useful to reveal acute exposures to this metal, but its effectiveness in other scenarios is questionable.

This limitation in actual diagnostic practice in conjunction with prolonged and low-intensity exposures to Al sources might explain the elevated proportion of patients presenting the diagnosis of bone Al accumulation in our cohort and from others studies [8–10, 12–14]. Since heterogeneous standards of water quality for hemodialysis treatment around the globe is not negligible it is plausible to expect these findings in other populations.

There are several sources of Al, besides the treated water for dialysis. Medications used in patients undergoing dialysis may contain Al, especially in intravenous form, such as dipyrrone, erythropoietin, and iron preparations, as well calcium salts [38]. The impact of this

contamination is unknown. Besides these drugs, calcium citrate and ferric citrate hydrate can increase Al absorption from the diet. Of note, in our cohort, we did not detect any patient in the use of calcium citrate or ferric citrate hydrate. As for diet, data on intestinal absorption of Al in healthy subjects reveal absorption of small quantities (0.06–0.1%). Factors that may influence absorption and its bioavailability are compounds that bind to Al in the intestinal lumen, gastric acidity, and the hardness of water consumed [39].

In our cohort, Al in bone was associated with bone pain, tendon rupture, and pruritus. In a study with 866 patients under hemodialysis, serum Al levels were identified as an independent predictor of pruritus. The authors claim the allergenic nature of Al that can induce immune reactions [8]. Severe symptoms of Al intoxication were not declared in our cohort, as were noted in the past.

Likewise, Al in bone was not associated with osteomalacia and adynamic bone disease, as were reported in the 90s from the last century. Al accumulation was equally distributed among the classical types of renal osteodystrophy and just minor perturbation in mineralization parameters was detected. The others histomorphometric parameters did not differ in the presence of the metal deposits in the bone. Although previous scientific evidence suggest that low bone turnover provides a possible physiological link between vascular calcification and MACE, evidence on this subject is not conclusive due to several factors such as bias in studies sample selection and size, the incidence of bone fractures, and other important hormonal changes like as in FGF23 levels [40–43].

We detected 28 bone fractures along 3.4 years of follow-up (29.8 bone fractures/1000 patients/years). This incidence is according to report by the literature for CKD patients stage 5 and 5 on dialysis (17.2 to 46.3/1000 patients/year in women and 10.6 to 24.3/1000 patients/year in men) [44]. Of note, bone Al accumulation in our sample was not associated with the incidence of bone fractures. The observed increase in Mlt in patients with bone Al accumulation could traduce mild disturbance on bone mineralization without significantly affecting bone volume, a surrogate marker of bone fractures in CKD patients.

In this study, we observed that bone Al accumulation was independently associated with major adverse cardiovascular events. In the past, the association between serum Al levels and mortality in CKD patients was documented [45, 46]. Tzu-Lin *et al.* reported the independent relation between the proportion of the heart size to the thoracic diameter and serum Al levels in patients on hemodialysis [47].

The advancement of molecular research has demonstrated myocardial and vascular toxicity by Al, as this metal can mediate oxidative damage, affects vascular reactivity, and the apoptosis of cardiomyocytes [23–27]. Zhou *et al.* administered different doses of AlCl<sub>3</sub> solution by intraperitoneal injection and measured the apoptosis of cardiomyocytes and the expression of apoptosis-related proteins. They observed that TUNEL staining showed more apoptosis and less expression of Bcl-2 in animals with Al exposure compared with those without Al exposure [23]. Another hypothesis is that Al deposition can stimulate the chronic inflammatory state and provide atherosclerosis [48].

This study has limitations. It is essentially a description of a longitudinal cohort and is not a random analysis. The extrapolation of these findings to the general dialysis community is uncertain. Bone biopsy was indicated exclusively by assistant Nephrologists, who also, entered clinical information. Prior knowledge of aluminum intoxication by the Nephrologists who indicated and performed the bone biopsy, as well, as their understanding of provided clinical information constitutes an unavoidable bias. Laboratory tests were not centralized in a single laboratory with research-controlled quality parameters; a limited number of patients had serum Al levels available (N = 57); bone fractures and MACE were adjudicated by telephone call with the nephrologists, the dialysis unit's staff, and the patients.



Our study has strengths. More importantly: an elevated proportion of patients has the diagnosis of bone Al accumulation, independently of renal osteodystrophy type, and this diagnosis was an independent predictor for MACE. Finally, we are proposing the new term “Al bone accumulation”, instead of “Al intoxication”, to refer the identification of Al in bone associated with non-severe symptoms (or subclinical manifestations) and outcomes.

## Conclusions

In this prospective cohort, an elevated proportion of patients have the diagnosis of bone Al accumulation, which was associated with a greater prevalence of bone pain, tendon rupture, and pruritus. Bone Al accumulation was associated with minor perturbations in bone dynamic parameters; no differences were noted in static bone parameters, the proportion of renal osteodystrophy types, and bone fractures. At follow-up, actual/prior diagnosis of bone Al accumulation and diabetes *mellitus* were independent predictors for major adverse cardiovascular events (MACE).

These findings suggest that bone Al accumulation may be considered a frequent and modifiable diagnosis in patients with CKD in the current Era, independently of overt Al toxicity. Efforts should be emphasized to improve water quality used for hemodialysis, as well quality of intravenous drugs and general measures to avoid Al exposition. More research is needed to understand the impact of consuming Al-containing food and water in patients with CKD, as well effects of early intervention for serum Al levels in patients with CKD.

## Supporting information

**S1 Data.**  
(SAV)

## Acknowledgments

The authors acknowledge the Brazilian Society of Nephrology and M. I. for technical support with the REBRABO platform. The authors also thank the collaboration of Brazilian nephrologists and the patients included in this study.

## Author Contributions

**Conceptualization:** Cinthia E. M. Carbonara, Andrei C. Sposito, Rodrigo Bueno Oliveira.

**Data curation:** Cinthia E. M. Carbonara, Noemi A. V. Roza, Kelcia R. S. Quadros, Renata A. França, André B. A. Esteves, Celia R. Pavan, Luciane M. dos Reis, Vanda Jorgetti.

**Formal analysis:** Cinthia E. M. Carbonara, Joaquim Barreto, Rodrigo Bueno Oliveira.

**Investigation:** Cinthia E. M. Carbonara, Kelcia R. S. Quadros, Renata A. França, André B. A. Esteves, Rodrigo Bueno Oliveira.

**Methodology:** Cinthia E. M. Carbonara, Vanda Jorgetti, Rodrigo Bueno Oliveira.

**Project administration:** Cinthia E. M. Carbonara, Rodrigo Bueno Oliveira.

**Supervision:** Rodrigo Bueno Oliveira.

**Validation:** Joaquim Barreto, Luciane M. dos Reis, Vanda Jorgetti.

**Visualization:** Rodrigo Bueno Oliveira.

**Writing – original draft:** Cinthia E. M. Carbonara, Rodrigo Bueno Oliveira.

**Writing – review & editing:** Cinthia E. M. Carbonara, Noemi A. V. Roza, Kelcia R. S. Quadros, Joaquim Barreto, Vanda Jorgetti, Andrei C. Sposito, Rodrigo Bueno Oliveira.

## References

1. Dunea G. Dialysis dementia: an epidemic that came and went. *ASAIO J* 2001; 47:192–4. <https://doi.org/10.1097/00002480-200105000-00002> PMID: 11374754
2. Fernandez-Martin JL, Canteros A, Serrano M, et al. Prevention of aluminium exposure through dialysis fluids. Analysis of changes in the last 8 years. *Nephrol Dial Transplant* 1998; 13(Suppl. 3):78–81. [https://doi.org/10.1093/ndt/13.suppl\\_3.78](https://doi.org/10.1093/ndt/13.suppl_3.78) PMID: 9568827
3. Smith GD, Winney RJ, McLean A, Robson JS. Aluminium-related osteomalacia: response to reverse osmosis water treatment. *Kidney Int* 1987; 32:96–101. <https://doi.org/10.1038/ki.1987.177> PMID: 3626303
4. Malluche HH. Aluminum and bone disease in chronic renal failure. *Nephrol Dial Transplant* 2002; 17:21–4.
5. Seidowsky A, Dupuis E, Druke T, et al. Aluminic intoxication in chronic hemodialysis. A diagnosis rarely evoked nowadays. Clinical case and review of the literature. *Nephrol Ther* 2018; 14:35–41.
6. González-Revaldería J, Casares M, de Paula M, et al. Biochemical and hematological changes in low-level aluminum intoxication. *Clin Chem Lab Med* 2000; 38:221–5. <https://doi.org/10.1515/CCLM.2000.032> PMID: 10905758
7. Lavergne V, Ghannoum M, Christie M, et al. Risk factors and consequences of hyperaluminumemia in a peritoneal dialysis cohort. *Perit Dial Int* 2012; 32:645–51. <https://doi.org/10.3747/pdi.2011.00203> PMID: 22855887
8. Ching-Wei H, Cheng-Hao W, Ming-Jen C, et al. Association between serum aluminum level and uremic pruritus in hemodialysis patients. *Sci Rep* 2018; 8:17251. <https://doi.org/10.1038/s41598-018-35217-6> PMID: 30467375
9. Ching-Wei H, Cheng-Hao W, Cheng-Chia L, et al. Association of low serum aluminum level with mortality in hemodialysis patients. *Ther Clin Risk Manag* 2016; 12:1417–1424. <https://doi.org/10.2147/TCRM.S113829> PMID: 27695338
10. Douthat WG, Garay G, de Arteaga J, et al. Biochemical and histological spectrum of renal osteodystrophy in Argentina. *Nefrologia* 2003; 23 Suppl 2:47–51.
11. National Kidney Foundation. K/DOQI clinical practice guidelines for bone metabolism and disease in chronic kidney disease. *Am J Kidney Dis* 2003; 42 (4 Suppl 3):S1–201. PMID: 14520607
12. Araújo SMHA, Ambrosini P, Lobão RRS, et al. The renal osteodystrophy pattern in Brazil and Uruguay: an overview. *Kidney Int Suppl* 2003; 85:S54–6. <https://doi.org/10.1046/j.1523-1755.63.s85.13.x> PMID: 12753266
13. Carbonara CEM, Reis LMD, Quadros KRDS, et al. Renal osteodystrophy and clinical outcomes: data from the Brazilian Registry of Bone Biopsies—REBRABO. *Braz J Nephrol* 2020; 42:138–146.
14. Meira RD, Carbonara CEM, Quadros KRDS, et al. The enigma of aluminum deposition in bone tissue from a patient with chronic kidney disease: a case report. *Braz J Nephrol* 2018; 40:201–205. <https://doi.org/10.1590/2175-8239-JBN-3882> PMID: 29927461
15. van Landeghem GF, D’Haese PC, Lamberts L, et al. Low serum aluminum values in dialysis patients with increased bone aluminum levels. *Clin Nephrol* 1998; 50: 69–76. PMID: 9725776
16. Remuzzi G, Mendis S, Tonelli M. The contribution of chronic kidney disease to the global burden of major noncommunicable diseases. *Kidney Int* 2011; 80:1258–70. <https://doi.org/10.1038/ki.2011.368> PMID: 21993585
17. Garcia-Garcia G, Jha V. World Kidney Day Steering Committee. CKD in disadvantaged populations. *Kidney Int* 2015; 87:251–3.
18. Jha V, Wang AY, Wang H. The impact of CKD identification in large countries: the burden of illness. *Nephrol Dial Transplant* 2012; 27 Suppl 3:iii32–8. <https://doi.org/10.1093/ndt/gfs113> PMID: 23115140
19. Li PK, Garcia-Garcia G, Lui SF, et al. World Kidney Day Steering Committee. Kidney Health for Everyone Everywhere—From Prevention to Detection and Equitable Access to Care. *Blood Purif* 2021; 50:1–8.
20. See EJ, Bello AK, Levin A, et al. Availability, coverage, and scope of health information systems for kidney care across world countries and regions. *Nephrol Dial Transplant* 2021; 37:159–167. <https://doi.org/10.1093/ndt/gfaa343> PMID: 33351951

21. Sola L, Levin NW, Johnson DW, Pecoits-Filho R, et al. Development of a framework for minimum and optimal safety and quality standards for hemodialysis and peritoneal dialysis. *Kidney Int Suppl* 2020; 10(1):e55–e62. <https://doi.org/10.1016/j.kisu.2019.11.009> PMID: 32149009
22. Prasad N, Jha V. Hemodialysis in Asia. *Kidney Dis (Basel)* 2015; 1:165–77. <https://doi.org/10.1159/000441816> PMID: 27536677
23. Zhou LiuFang, He Mingjie, Li XiaoLan. Molecular mechanism of aluminum-induced oxidative damage and apoptosis in rat cardiomyocytes. *Biol Trace Elem Res* 2022; 200:308–317. <https://doi.org/10.1007/s12011-021-02646-w> PMID: 33634365
24. Liu Zhen, He Chunhua, Chen Ming, et al. The effects of lead and aluminum exposure on congenital heart disease and the mechanism of oxidative stress. *Reprod Toxicol* 2018; 81:93–98. <https://doi.org/10.1016/j.reprotox.2018.07.081> PMID: 30031113
25. Saleem Ayisha, Khadija Ghulam, Akhtar Zafrin, et al. Short-term exposure to titanium, aluminum and niobium (Ti-6Al-4Nb) alloy powder can disturb the serum low-density lipoprotein concentrations and antioxidant profile in vital organs but not the behavior of male albino mice. *Drug Chem Toxicol* 2020; 43: 298–306. <https://doi.org/10.1080/01480545.2018.1525394> PMID: 30449194
26. Schmidt PM, Escobar AG, Torres JG, et al. Aluminum exposure for one hour decreases vascular reactivity in conductance and resistance arteries in rats. *Toxicol Appl Pharmacol* 2016; 313:109–118. <https://doi.org/10.1016/j.taap.2016.10.023> PMID: 27984129
27. El-Hussainy el-HM, Hussein AM, Abdel-Aziz A, et al. Effects of aluminum oxide (Al<sub>2</sub>O<sub>3</sub>) nanoparticles on ECG, myocardial inflammatory cytokines, redox state, and connexin 43 and lipid profile in rats: possible cardioprotective effect of gallic acid. *Can J Physiol Pharmacol* 2016; 94:868–78. <https://doi.org/10.1139/cjpp-2015-0446> PMID: 27191243
28. de Oliveira RB, Barreto FC, Custódio MR, et al. Brazilian Registry of Bone Biopsy (REBRABO): design, data, elements, and methodology. *Braz J Nephrol* 2014; 36:352–359. <https://doi.org/10.5935/0101-2800.20140050> PMID: 25317618
29. Kidney Disease: Improving Global Outcomes. KDIGO clinical practice guideline for the evaluation and management of Chronic Kidney Disease. *Kidney Int Suppl.* 2013; 3:1–150.
30. Hernandez JD, Wesseling K, Pereira R, et al. Technical approach to iliac crest biopsy. *Clin J Am Soc Nephrol* 2008; 3 (Suppl 3):S164–S169. <https://doi.org/10.2215/CJN.00460107> PMID: 18988702
31. Dempster David W, Compston Juliet E, Drezner Marc K, et al. Standardized nomenclature, symbols, and units for bone histomorphometry: a 2012 update of the report of the ASBMR Histomorphometry Nomenclature Committee. *J Bone Miner Res* 2013; 28:2–17. <https://doi.org/10.1002/jbmr.1805> PMID: 23197339
32. Dos Reis LM, Batalha JR, Muñoz DR, et al. Brazilian normal static bone histomorphometry: effects of age, sex, and race. *J Bone Miner Metab* 2007; 25: 400–406. <https://doi.org/10.1007/s00774-007-0778-4> PMID: 17968492
33. Vedi S, Compston JE, Webb A, Tighe JR. Histomorphometric analysis of dynamic parameters of trabecular bone formation in the iliac crest of normal British subjects. *Metab Bone Dis Relat Res* 1983; 5:69–74. [https://doi.org/10.1016/0221-8747\(83\)90004-8](https://doi.org/10.1016/0221-8747(83)90004-8) PMID: 6672539
34. Moe S, Drüeke T, Cunningham J, et al. Kidney Disease: Improving Global Outcomes (KDIGO). Definition, evaluation, and classification of renal osteodystrophy: a position statement from Kidney Disease: Improving Global Outcomes (KDIGO). *Kidney Int* 2006; 69:1945–53.
35. Jaffe JA, Liftman C, Glickman JD. Frequency of elevated serum aluminum levels in adult dialysis patients. *Am J Kidney Dis* 2005; 46: 316–319. <https://doi.org/10.1053/j.ajkd.2005.04.020> PMID: 16112051
36. Sandhu G, Djebali D, Bansal A, et al. Serum concentrations of aluminum in hemodialysis patients. *Am J Kidney Dis* 2011; 57: 523–525. <https://doi.org/10.1053/j.ajkd.2010.10.051> PMID: 21257246
37. van Landeghem GF, D'Haese PC, Lamberts, De Broe ME. Competition of iron and aluminum for transferrin: the molecular basis for aluminum deposition in iron-overload dialysis patients? *Exp Nephrol* 1997; 5:239–45.
38. Bohrer D, Bertagnoli DC, Oliveira SM, et al. Drugs as a hidden source of aluminium for chronic renal patients. *Nephrol Dial Transplant.* 2007; 22: 605–611. <https://doi.org/10.1093/ndt/gfl569> PMID: 17035374
39. Drüeke TB. Intestinal absorption of aluminium in renal failure. *Nephrol Dial Transplant* 2002; (17 Suppl 2):13–6. [https://doi.org/10.1093/ndt/17.suppl\\_2.13](https://doi.org/10.1093/ndt/17.suppl_2.13) PMID: 11904352
40. Bover J, Ureña P, Brandenburg V, et al. Adynamic bone disease: from bone to vessels in chronic kidney disease. *Semin Nephrol.* 2014; 34:626–40. <https://doi.org/10.1016/j.semnephrol.2014.09.008> PMID: 25498381

41. Jean G, Lataillade D, Genet L, et al. Association between very low PTH levels and poor survival rates in haemodialysis patients: results from the French ARNOS cohort. *Nephron Clin Pract.* 2011; 118:c211–6. <https://doi.org/10.1159/000321642> PMID: 21178378
42. Goldenstein PT, Motta RE, do Carmo LPF, et al. Parathyroidectomy improves survival in patients with severe hyperparathyroidism: a comparative study. *PLoS One.* 2013; 8:e68870. <https://doi.org/10.1371/journal.pone.0068870> PMID: 23940515
43. Gutiérrez OM, Mannstadt M, Isakova T, et al. Fibroblast growth factor 23 and mortality among patients undergoing hemodialysis. *N Engl J Med.* 2008; 359:584–92. <https://doi.org/10.1056/NEJMoa0706130> PMID: 18687639
44. Naylor KL, McArthur E, Leslie WD, et al. The three-year incidence of fracture in chronic kidney disease. *Kidney Int.* 2014; 86:810–8. <https://doi.org/10.1038/ki.2013.547> PMID: 24429401
45. Chazan JA, Lew NL, Lowrie EG. Increased serum aluminum. An independent risk factor for mortality in patients undergoing long-term hemodialysis. *Arch Intern Med* 1991; 151:319–322. <https://doi.org/10.1001/archinte.151.2.319> PMID: 1992959
46. Ming-Hsien T, Yu-Wei F, Hung-Hsiang L, et al. Association of serum aluminum levels with mortality in patients on chronic hemodialysis. *Sci Rep* 2018; 13; 8:16729.
47. Tzu-Lin W, Yu-Wei F, Jyh-Gang L, et al. Association between serum aluminum levels and cardiothoracic ratio in patients on chronic hemodialysis. *Plos One* 2017; 12:e0190008. <https://doi.org/10.1371/journal.pone.0190008> PMID: 29261793
48. Morena M, Delbosc S, Dupuy AM, et al. Overproduction of reactive oxygen species in end-stage renal disease patients: a potential component of hemodialysis-associated inflammation. *Hemodial Int.* 2005; 9:37–46. <https://doi.org/10.1111/j.1492-7535.2005.01116.x> PMID: 16191052
